# Supplementary material for: Evaluation of the Probiotic Strain Bifidobacterium longum subsp. Infantis CECT 7210 Capacities to Improve Health Status and Fight Digestive Pathogens in a Piglet Model
Source: PubMed Central journal article supplement (PMC5386966; doi:10.3389/fmicb.2017.00533), 2017-04-11
Supplement: Table1.pdf [file Table1.pdf]

*Supplementary Material*

**Evaluation of the probiotic strain *Bifidobacterium longum*  
subsp. *infantis* CECT 7210 capacities to improve health status  
and fight digestive pathogens in a piglet model**

**Emili Barba-Vidal<sup>1</sup>, Lorena Castillejos<sup>1</sup>, Paola López-Colom<sup>1</sup>, Montserrat Rivero Urgell<sup>2</sup>, José A. Moreno Muñoz<sup>2</sup> and Susana M. Martín-Orúe<sup>1\*</sup>**

**\*Correspondence:** Susana M. Martín-Orúe. [Susana.Martin@uab.cat](mailto:Susana.Martin@uab.cat)

**Supplementary Table ST.1.** Ingredient and nutrient composition of the experimental diets as-fed basis, g/kg.

| <b>Ingredients</b>                     |       |
|----------------------------------------|-------|
| Maize                                  | 280.8 |
| Wheat                                  | 170.0 |
| Barley 2 row                           | 150.0 |
| Extruded soybean                       | 122.4 |
| Sweet whey-powder (cattle)             | 100.0 |
| Fishmeal                               | 50.0  |
| Soybean meal 44                        | 50.0  |
| Whey-powder 50% fat                    | 30.3  |
| Mono-calcium phosphate                 | 21.3  |
| Calcium carbonate (CaCO <sub>3</sub> ) | 8.2   |
| L-Lysine HCL                           | 4.5   |
| Vitamin-Mineral Premix <sup>A</sup>    | 4.0   |
| Sodium chloride (marine salt)          | 3.0   |
| DL-Methionine 99                       | 2.4   |
| L-Threonine                            | 2.3   |
| L-Tryptophane                          | 0.9   |
| <b>Analyzed composition</b>            |       |
| DM                                     | 911.0 |
| CP                                     | 174.9 |
| CF                                     | 59.4  |
| NDF                                    | 92.7  |
| ADF                                    | 34.8  |
| Ash                                    | 72.5  |

<sup>A</sup> Provided per kilogram of complete diet: 10,200 IU vitamin A, 2,100 IU vitamin D<sub>3</sub>, 39.9 mg vitamin E, 3 mg vitamin K<sub>3</sub>, 2 mg vitamin B<sub>1</sub>, 2.3 mg vitamin B<sub>2</sub>, 3 mg vitamin B<sub>6</sub>, 0.025 mg vitamin B<sub>12</sub>, 20 mg calcium panthotenate, 60 mg nicotinic acid, 0.1 mg biotin, 0.5 mg folic acid, 150 mg Fe, 156 mg Cu, 0.5 mg Co, 120 mg Zn, 49.8 mg Mn, 2 mg I, 0.3 mg Se.
