# Supplementary material for: Evaluation of the Probiotic Strain Bifidobacterium longum subsp. Infantis CECT 7210 Capacities to Improve Health Status and Fight Digestive Pathogens in a Piglet Model
Source: PubMed Central journal article supplement (PMC5386966; doi:10.3389/fmicb.2017.00533), 2017-04-11
Supplement: Table2.pdf [file Table2.pdf]

*Supplementary Material*

**Evaluation of the probiotic strain *Bifidobacterium longum*  
subsp. *infantis* CECT 7210 capacities to improve health status  
and fight digestive pathogens in a piglet model**

**Emili Barba-Vidal<sup>1</sup>, Lorena Castillejos<sup>1</sup>, Paola López-Colom<sup>1</sup>, Montserrat Rivero Urgell<sup>2</sup>, José A. Moreno Muñoz<sup>2</sup> and Susana M. Martín-Orúe<sup>1\*</sup>**

**\*Correspondence:** Susana M. Martín-Orúe. [Susana.Martin@uab.cat](mailto:Susana.Martin@uab.cat)

**Supplementary Table ST.2.** Ileal pH values, ammonia concentration and fermentation products for Days 4 and 8 post-inoculation (PI) in *Salmonella* and ETEC K88 trials.

|                                   | Days PI | Treatments <sup>A</sup> |      |      |      | RSD <sup>B</sup> | P-value   |           |             |
|-----------------------------------|---------|-------------------------|------|------|------|------------------|-----------|-----------|-------------|
|                                   |         | CN                      | CP   | NN   | NP   |                  | Challenge | Probiotic | Interaction |
| <b>Trial 1. <i>Salmonella</i></b> |         |                         |      |      |      |                  |           |           |             |
| <b>pH</b>                         | 4       | 6.14                    | 6.16 | 6.22 | 6.32 | 0.274            | 0.318     | 0.618     | 0.724       |
|                                   | 8       | 5.88                    | 5.90 | 5.84 | 6.28 | 0.281            | 0.175     | 0.070     | 0.096       |
| <b>NH<sub>3</sub></b><br>(mmol/L) | 4       | 2.42                    | 2.34 | 1.65 | 1.32 | 0.901            | 0.033     | 0.604     | 0.758       |
|                                   | 8       | 1.20                    | 0.97 | 0.63 | 0.83 | 0.601            | 0.183     | 0.958     | 0.421       |
| <b>SCFA</b><br>(mmol/kg)          | 4       | 5.96                    | 3.83 | 5.30 | 4.90 | 2.424            | 0.906     | 0.460     | 0.610       |
|                                   | 8       | 3.43                    | 4.01 | 2.95 | 4.05 | 1.117            | 0.662     | 0.112     | 0.612       |
| <b>Lactic acid</b><br>(mmol/kg)   | 4       | 32.6                    | 41.3 | 43.6 | 15.2 | 33.60            | 0.609     | 0.507     | 0.217       |
|                                   | 8       | 71.6                    | 66.0 | 72.7 | 33.9 | 39.22            | 0.373     | 0.206     | 0.339       |
| <b>Trial 2. ETEC K88</b>          |         |                         |      |      |      |                  |           |           |             |
| <b>pH</b>                         | 4       | 6.19                    | 6.28 | 6.18 | 6.34 | 0.122            | 0.718     | 0.024     | 0.508       |
|                                   | 9       | 6.24                    | 6.13 | 6.43 | 6.39 | 0.124            | <0.001    | 0.181     | 0.500       |
| <b>NH<sub>3</sub></b><br>(mmol/L) | 4       | 3.80                    | 3.72 | 4.02 | 3.32 | 1.270            | 0.867     | 0.491     | 0.572       |
|                                   | 9       | 0.98                    | 0.84 | 1.15 | 0.74 | 0.321            | 0.777     | 0.058     | 0.335       |
| <b>SCFA</b><br>(mmol/kg)          | 4       | 5.16                    | 4.68 | 6.43 | 5.00 | 2.458            | 0.486     | 0.403     | 0.678       |
|                                   | 9       | 10.67                   | 8.52 | 4.00 | 2.87 | 5.765            | 0.051     | 0.578     | 0.863       |
| <b>Lactic acid</b><br>(mmol/kg)   | 4       | 63.5                    | 30.9 | 18.1 | 40.9 | 31.00            | 0.202     | 0.719     | 0.052       |
|                                   | 9       | 33.6                    | 41.1 | 19.5 | 5.9  | 30.40            | 0.076     | 0.820     | 0.433       |

<sup>A</sup> Treatments: CN, challenged + no probiotic; CP, challenged + probiotic; NN, no challenge + no probiotic; NP, no challenge + probiotic. <sup>B</sup> Residual standard deviation. n = 8 for groups CN and CP, n = 4 for groups NN and NP.
